# Supplementary material
Source: MDPI journal article supplement (https://www.mdpi.com/2073-4395/11/4/770)
Supplement: s1 [file s1]

# **Factors that influence nitrous oxide emissions from agricultural soils as well as their representation in simulation models: A review**

**Cong Wang<sup>1,\*</sup>, Barbara Amon<sup>2,3</sup>, Karsten Schulz<sup>1</sup>, Bano Mehdi<sup>1,4</sup>**

1 Institute for Hydrology and Water Management, Department of Water, Atmosphere and Environment.  
University of Natural Resources & Life Science, Vienna

2 Leibniz Institute for Agricultural Engineering, Potsdam, Germany

3 University of Zielona Góra, Faculty of Civil Engineering, Architecture and Environmental Engineering, Poland

4 Institute of Agronomy, Department of Crop Science. University of Natural Resources & Life Science, Vienna

\*corresponding author at: Institute for Hydrology and Water Management, University of Natural Resources and Life Sciences, Muthgasse 18, 1190 Vienna, Austria. Email address: [cong.wang@boku.ac.at](mailto:cong.wang@boku.ac.at)

Table S1. Factors that influence N<sub>2</sub>O emissions from peer-reviewed literature.

| Review literature          | Micro | SOC | N | WFPS | Texture | T | pH & salinity | Tillage | Crops | Fertilizer | Irrigation | Harvest & residues | Length | Types |
|----------------------------|-------|-----|---|------|---------|---|---------------|---------|-------|------------|------------|--------------------|--------|-------|
| Abdalla et al. [1]         |       |     | √ | √    |         | √ |               | √       | √     | √          |            | √                  |        |       |
| Aguilera et al. [2]        |       | √   | √ | √    | √       | √ | √             | √       | √     | √          | √          |                    | √      |       |
| Beauchamp [3]              | √     | √   | √ | √    | √       | √ | √             | √       | √     | √          | √          | √                  |        |       |
| Bremner [4]                | √     | √   | √ | √    |         | √ | √             |         |       |            |            |                    |        |       |
| Bouwman et al. [5]         |       | √   | √ | √    | √       | √ | √             |         | √     | √          |            |                    | √      |       |
| Butterbach_Bahl et al. [6] | √     | √   | √ | √    | √       | √ | √             |         | √     |            |            |                    |        |       |
| Cameron et al. [7]         |       | √   | √ | √    | √       | √ | √             |         |       | √          |            |                    |        |       |
| Charles et al. [8]         |       | √   | √ | √    | √       | √ | √             | √       | √     |            |            |                    |        |       |
| Dalal et al. [9]           |       | √   | √ | √    |         | √ | √             |         |       | √          |            |                    |        | √     |
| De Klein et al. [10]       | √     | √   | √ | √    | √       | √ | √             |         |       | √          |            |                    |        |       |
| Eichner [11]               | √     | √   | √ | √    | √       | √ | √             | √       | √     | √          | √          | √                  |        |       |
| Groffman [12]              |       |     |   |      |         |   |               |         |       |            |            |                    |        | √     |
| Lesschen et al. [13]       |       | √   | √ | √    | √       | √ | √             |         | √     | √          |            | √                  |        |       |
| Meurer et al. [14]         |       |     |   |      | √       |   |               |         | √     |            |            |                    |        |       |
| Mosier [15]                |       | √   | √ | √    | √       | √ | √             |         | √     | √          | √          |                    |        |       |
| Oertel et al. [16]         |       | √   | √ | √    | √       | √ | √             |         | √     |            |            |                    |        | √     |
| Saggar et al. [17]         |       | √   | √ | √    | √       | √ | √             |         | √     |            |            | √                  |        | √     |
| Sanz_Cobena et al. [18]    |       |     |   |      |         |   |               | √       | √     | √          | √          | √                  |        |       |
| Signor et al. [19]         |       | √   | √ | √    | √       | √ |               | √       |       | √          |            | √                  |        |       |
| Smith et al. [20]          |       |     | √ | √    |         |   |               |         |       | √          |            | √                  | √      |       |
| Smith [21]                 |       |     | √ | √    | √       | √ |               |         |       | √          |            |                    |        |       |
| Snyder et al. [22]         |       | √   | √ | √    | √       | √ | √             | √       | √     | √          | √          | √                  |        |       |
| Stehfest & Bouwman [23]    |       | √   | √ | √    | √       |   | √             |         | √     | √          |            |                    | √      |       |
| Stein & Yung [24]          | √     |     |   | √    |         | √ |               |         |       |            |            |                    |        |       |
| Trost et al. [25]          | √     | √   |   | √    | √       |   |               | √       |       | √          | √          |                    |        |       |
| Uchida et al. [26]         | √     |     |   | √    | √       |   |               | √       |       | √          |            |                    |        |       |
| Wang et al. [27]           |       | √   | √ |      | √       | √ | √             |         | √     | √          |            |                    |        |       |
| Xu et al. [28]             |       | √   | √ | √    | √       |   |               |         | √     | √          |            | √                  |        |       |

\*Micro: microbes; T: temperature; Length: length of measurement period; Types: types of measurements.

Model part:

## 1 The DAYCENT model

### Nitrification process

DAYCENT calculates nitrification as a function of soil moisture, soil pH, soil temperature and soil  $\text{NH}_4^+$  level (Eq.S1) [29, 30]. The equation (Eq.S1) calculates the total gas flux from nitrification ( $\text{N}_2\text{O}$  and  $\text{NO}_x$ ), and  $\text{N}_2\text{O}$  emissions from nitrification is partitioned from  $\text{NO}_x$  by Eq.S17.

$$N^{\text{N}_2\text{O}} = F_\theta * F_{pH} * F_{Tmp} * (K_{mx} + N_{mx} * F_{\text{NH}_4}) \quad (\text{Eq. S1})$$

$F_\theta$ ,  $F_{pH}$ ,  $F_{Tmp}$ , and  $F_{\text{NH}_4}$  are the effects soil moisture, soil pH, soil temperature and soil  $\text{NH}_4$  level respectively on nitrification.  $K_{mx}$  is the N turnover coefficient, which is a function of the soil texture, soil N fertility, N fertilizer additions, and soil management practices.  $K_{mx}$  should be estimated with observed  $\text{N}_2\text{O}$  data or observed potential soil N mineralized data.  $N_{mx}$  is the maximum  $\text{N}_2\text{O}$  gas fluxes caused by nitrification with excess soil  $\text{NH}_4^+$ . Equations that calculate the effects of soil moisture, soil pH, soil temperature and soil  $\text{NH}_4$  on nitrification are as follows:

$$F_\theta = \left( \frac{WFPS-b}{a-b} \right)^{d * \left( \frac{b-a}{a-c} \right)} * \left( \frac{WFPS-c}{a-c} \right)^d \quad (\text{Eq. S2})$$

$$WFPS = \frac{(SW_{ly} * \rho_b)}{\text{soil porosity}} \quad (\text{Eq.S3})$$

$$\text{soil porosity} = 1 - \rho_b / 2.65 \quad (\text{Eq.S4})$$

$$F_{pH} = 0.56 + \frac{\arctan(\pi * 0.45 * (-5 + pH))}{\pi} \quad (\text{Eq. S5})$$

$$F_{Tmp} = -0.06 + 0.13 * e^{0.07 * \text{soilt}} \quad (\text{Eq. S6})$$

$$F_{\text{NH}_4} = 1 - e^{-0.0105 * \text{NH}_4} \quad (\text{Eq. S7})$$

Where  $SW_{ly}$  is gravimetric water content.  $\rho_b$  is soil bulk density. Parameters a, b, c, and d are empirical soil texture parameters according to the following Table S2:

Table S2. Soil texture parameters for nitrification rate.

| Soil Texture | a    | b    | c       | d    |
|--------------|------|------|---------|------|
| Sandy        | 0.55 | 1.70 | -0.0070 | 3.22 |
| Medium       | 0.60 | 1.27 | 0.0012  | 2.84 |

### Denitrification process

The DAYCENT model calculates denitrification as a function of soil  $\text{NO}_3^-$  level, soil C, and soil moisture (Eq.S8) [29]. The equation S8 calculates the total gas flux ( $\text{N}_2\text{O} + \text{N}_2 + \text{NO}_x$ ) from denitrification, and  $\text{N}_2\text{O}$  emissions is differentiated from  $\text{N}_2$  by Eq.S12 and from  $\text{NO}_x$  by Eq.S17.

$$D_t = \min(F_d(\text{NO}_3), F_d(C)) * F_d(\theta) \quad (\text{Eq. S8})$$

$F_d(\text{NO}_3)$  is the maximum total N gas flux for a given soil  $\text{NO}_3^-$  level,  $F_d(C)$  is the maximum total N gas flux for a given soil respiration rate, and  $F_d(\theta)$  is the effect of soil moisture on the denitrification rate. Equations for the calculation of the impacts of soil  $\text{NO}_3^-$  levels, soil C and soil moisture on denitrification are as follows:

$$F_d(NO_3) = 11000 + \frac{40000 * \tan(\pi * 0.002 * (NO_3 - 180))}{\pi} \quad (\text{Eq. S9})$$

$$F_d(C) = \frac{24000}{\left(1 + \frac{200}{e^{0.35 * CO_2}}\right)} - 100 \quad (\text{Eq. S10})$$

$$F_d(\theta) = \frac{a}{b \left(\frac{c}{b^{d * WFPS}}\right)} \quad (\text{Eq. S11})$$

Where a, b, c, and d are empirical soil texture parameters according to the following Table S3.

Table S3. Soil texture parameters for denitrification rate.

| Soil Texture | a     | b  | c  | d    |
|--------------|-------|----|----|------|
| Sandy        | 1.56  | 12 | 16 | 2.01 |
| Medium       | 4.82  | 14 | 16 | 1.39 |
| Fine         | 60.00 | 18 | 22 | 1.06 |

### Partitioning N<sub>2</sub> from N<sub>2</sub>O

After the total N<sub>2</sub> and N<sub>2</sub>O emissions from denitrification is calculated by the equation (Eq.S8), the equation (Eq.S12) is used for partitioning N<sub>2</sub> from N<sub>2</sub>O [29]:

$$R_{N_2/N_2O} = \min(F_r(NO_3), F_r(C)) * F_r(\theta) \quad (\text{Eq. S12})$$

$F_r(NO_3)$ ,  $F_r(C)$ , and  $F_r(\theta)$  are the effect of soil NO<sub>3</sub><sup>-</sup>, soil C and soil moisture on the ratio N<sub>2</sub>/N<sub>2</sub>O. Equations for calculation the effects of soil NO<sub>3</sub><sup>-</sup>, soil C and soil moisture on N<sub>2</sub>/N<sub>2</sub>O ratio are as following:

$$F_r(NO_3) = \left(1 - \left(0.5 + \frac{1 * \tan(\pi * 0.01 * (NO_3 - 190))}{\pi}\right)\right) * 25 \quad (\text{Eq. S13})$$

$$F_r(C) = 13 + \frac{30.78 * \tan(\pi * 0.07 * (C - 13))}{\pi} \quad (\text{Eq. S14})$$

$$F_r(\theta) = \frac{1.4}{13 \left(\frac{17}{13^{(2.2 * WFPS)}}\right)} \quad (\text{Eq. S15})$$

Therefore, N<sub>2</sub> production during denitrification is:

$$D_{N_2} = \frac{D_t * R_{N_2/N_2O}}{1 + R_{N_2/N_2O}} \quad (\text{Eq. S16})$$

### Partitioning NO<sub>x</sub> from N<sub>2</sub>O

Both nitrification and denitrification processes produce NO<sub>x</sub>. The equation (Eq.S17) is used to differentiate NO<sub>x</sub> from N<sub>2</sub>O [31]:

$$NO_x = RNO_x * N_2O_{den} + RNO_x * N_2O_{nit} * P \quad (\text{Eq. S17})$$

$$RNO_x = 15.2 + (35.5 * \tan(0.68\pi(10D/D_o - 1.86)))/\pi \quad (\text{Eq. S18})$$

$RNO_x$  is the ratio of NO<sub>x</sub> to N<sub>2</sub>O fluxes,  $D/D_o$  is the soil gas diffusivity, which is calculated as a function of WFPS and soil physical properties,  $N_2O_{den}$  is the simulated N<sub>2</sub>O flux from denitrification,  $N_2O_{nit}$  is the simulated N<sub>2</sub>O flux from nitrification, and P is a pulse multiplier.

In the DAYCENT model, N<sub>2</sub>O production from nitrification and denitrification is given by:

$$N_2O = N^{N_2O} + D_t - D_{N_2} - NO_x \quad (\text{Eq. S19})$$

## 2 The DNDC model

### Nitrification process

As a microbe-mediated process, the rate of nitrification in the DNDC model is regulated by soil temperature, soil moisture, soil pH and nitrifier's activity, which relies on two substrates, DOC and  $\text{NH}_4^+$ . The growth and death rates of nitrifiers are set as functions of DOC and soil moisture. The reaction rate of nitrification is subject to nitrifier's activity as well as other environmental factors such as  $\text{NH}_4^+$  availability and soil pH. The nitrification-derived  $\text{N}_2\text{O}$  emissions is a fraction of the nitrification rate [32].

Relative growth ( $R_G$ ) and death rates ( $R_D$ ) of nitrifiers:

$$R_G = 0.0166 * ([DOC]/(1.0 + [DOC]) + F_\theta/(1.0 + F_\theta)) \quad (\text{Eq. S20})$$

$$R_D = 0.008 * \text{Nitrifier} * 1.0/(1.0 + [DOC])/(1.0 + F_\theta) \quad (\text{Eq. S21})$$

Where  $[DOC]$  is dissolved organic carbon content (kg C/ha),  $F_\theta$  is a soil moisture factor, and *Nitrifier* is biomass of nitrifier.

Net increase in nitrifier biomass:

$$d\text{Nitrifier}/dt = (R_G - R_D) * \text{Nitrifier} * F_{Tmp} * F_\theta \quad (\text{Eq. S22})$$

Nitrification rate:

$$N^{N_2O} = 0.005 * [\text{NH}_4^+] * \text{Nitrifier} * pH \quad (\text{Eq. S23})$$

Where  $[\text{NH}_4^+]$  is concentration of ammonium (kg N/ha) and  $pH$  is the soil pH.

Soil moisture factor in nitrification

$$F_\theta = 0.8 + 0.21 * (1.0 - WFPS) \quad WFPS > 0.05 \quad (\text{Eq. S24})$$

$$F_\theta = 0.0 \quad WFPS \leq 0.05 \quad (\text{Eq. S25})$$

Where  $WFPS$  is the soil water content in water filled porosity.

Soil temperature factor in nitrification.

$$F_{Tmp} = 3.503^{((60-T)/25.78)} * e^{(3.503*(T-34.22)/25.78)} \quad (\text{Eq. S26})$$

Where  $T$  is the soil temperature.

$\text{N}_2\text{O}$  production through nitrification:

$$N_2O_N = 0.0024 * N^{N_2O} \quad (\text{Eq. S27})$$

### Denitrification process

In the DNDC model, denitrification process is a series of microbe-mediated reactions that sequentially reduce  $\text{NO}_3^-$  to  $\text{NO}_2^-$ ,  $\text{NO}$ ,  $\text{N}_2\text{O}$ , and finally to  $\text{N}_2$ . Denitrification rate is a function of denitrifiers, DOC,  $\text{CO}_2$ , N concentration, temperature, and pH in soils [32].

Relative growth rates of  $\text{NO}_x$  denitrifiers is simulated using:

$$R_{NO_x} = R_{NO_x,max} * ([DOC]/(K_C + [DOC])) * ([NO_x]/(K_N + [NO_x])) \quad (\text{Eq. S28})$$

$$R_{DN} = F_{Tmp} * (R_{NO_3} * F_{pH-NO_3} + R_{NO_2} * F_{pH-NO_2} + R_{NO} * F_{pH-NO} + R_{N_2O} * F_{pH-N_2O}) \quad (\text{Eq. S29})$$

$$(dDenitrifier/dt)_g = R_{DN} * Denitrifier \quad (\text{Eq. S30})$$

Where  $R_{NO_x, max}$  is the maximum growth rate of  $NO_3^-$ ,  $NO_2^-$ ,  $NO$ , or  $N_2O$  denitrifiers.  $[DOC]$  is dissolved organic carbon content (kg C/ha).  $[NO_x]$  is concentration of  $NO_3^-$ ,  $NO_2^-$ ,  $NO$ , or  $N_2O$  in soil water (kg N/ha).  $K_c$  is half-saturation value of soluble C in the Monod model (kg C/m<sup>3</sup> soil water).  $K_N$  is half-saturation value of  $NO_3^-$ ,  $NO_2^-$ ,  $NO$  or  $N_2O$  in the Monod model (kg N/m<sup>3</sup> soil water).  $F_{tmp}$  is a temperature factor.  $F_{pH-NO_3^-}$ ,  $F_{pH-NO_2^-}$ ,  $F_{pH-NO}$  and  $F_{pH-N_2O}$  is soil pH factors, and  $Denitrifier$  is biomass of denitrifier.

Relative death rates of denitrifiers:

$$(dDenitrifier/dt)_d = M_c * Y_c * Denitrifier \quad (\text{Eq. S31})$$

Where  $M_c$  is maintenance coefficient of C (kg C/kg C/ha) and  $Y_c$  is maximum growth yield on soluble carbon (kg C/kg C).

Consumption of DOC and  $CO_2$  production through denitrification:

$$dC_{con}/dt = (R_{DN}/Y_c + M_c) * Denitrifier \quad (\text{Eq. S32})$$

$$dCO_2/dt = dC_{con}/dt - dDenitrifier/dt \quad (\text{Eq. S33})$$

Consumption of  $NO_x$  through denitrification:

$$d(NO_3)/dt = (R_{NO_3}/Y_{NO_3} + M_{NO_3} * [NO_3]/[N]) * Denitrifier * F_{pH-NO_3} * F_{tmp} \quad (\text{Eq. S34})$$

$$d(NO_2)/dt = (R_{NO_2}/Y_{NO_2} + M_{NO_2} * [NO_2]/[N]) * Denitrifier * F_{pH-NO_2} * F_{tmp} \quad (\text{Eq. S35})$$

$$d(NO)/dt = (R_{NO}/Y_{NO} + M_{NO} * [NO]/[N]) * Denitrifier * F_{pH-NO} * F_{tmp} \quad (\text{Eq. S36})$$

$$d(N_2O)/dt = (R_{N_2O}/Y_{N_2O} + M_{N_2O} * [N_2O]/[N]) * Denitrifier * F_{pH-N_2O} * F_{tmp} \quad (\text{Eq. S37})$$

Where  $Y_{NO_3}$ ,  $Y_{NO_2}$ ,  $Y_{NO}$ , and  $Y_{N_2O}$  is the maximum growth yield on  $NO_3^-$ ,  $NO_2^-$ ,  $NO$ , or  $N_2O$  (kg C/kg N).  $M_{NO_3}$ ,  $M_{NO_2}$ ,  $M_{NO}$ , and  $M_{N_2O}$  is the maintenance coefficient of  $NO_3^-$ ,  $NO_2^-$ ,  $NO$ , or  $N_2O$  (kg N/kg/ha), and  $[N]$  is the total nitrogen as the sum of  $NO_3^-$ ,  $NO_2^-$ ,  $NO$ , and  $N_2O$  (kg N/ha).

Assimilation of N during denitrification:

$$dN/dt = (dDenitrifier/dt)_g / (C/N)_{Denitrifier} \quad (\text{Eq. S38})$$

Where  $(C/N)_{Denitrifier}$  is C/N ratio in denitrifiers.

Soil temperature factor in denitrification:

$$F_{tmp} = 2.0^{(T-22.5)/10.0} \quad T \leq 60.0 \quad (\text{Eq. S39})$$

$$F_{tmp} = 0.0 \quad T > 60.0 \quad (\text{Eq. S40})$$

Where  $T$  is the soil temperature.

Soil pH factor in denitrification:

$$F_{pH-NO_3} = 1 - 1/(1 + e^{((pH-4.25)/0.5)}) \quad (\text{Eq. S41})$$

$$F_{pH-NO_2} = F_{pH-NO} = 1 - 1/(1 + e^{((pH-5.25)/1)}) \quad (\text{Eq. S42})$$

$$F_{pH-N_2O} = 1 - 1/(1 + e^{((pH-6.25)/1.5)}) \quad (\text{Eq. S43})$$

Where  $pH$  is the soil pH.

### 3 The SWAT model

#### Nitrification process

The SWAT model treats nitrification as a function of soil  $\text{NO}_3^-$ , soil moisture and soil temperature [33]. We also list the equation here for considering the impact of soil pH on nitrification, which is used by Shrestha et al. [34] and Wagena et al. [35]. Therefore, the equation for nitrification is as following (Eq.S44):

$$N^{N_2O} = F_{NH_4} * K_2 * F_{\theta} * F_{T_{mp}} * F_{pH} \quad (\text{Eq. S44})$$

Where  $N^{N_2O}$  is  $\text{N}_2\text{O}$  flux from nitrification ( $\text{g N ha}^{-1} \text{ d}^{-1}$ ),  $K_2$  is the fraction of nitrified N lost as  $\text{N}_2\text{O}$ .  $F_{NH_4}$  is the rate of nitrification.  $F_{\theta}$ ,  $F_{T_{mp}}$ , and  $F_{pH}$  is the effect of soil moisture, temperature, and soil pH on nitrification, respectively.

The rate of nitrification:

$$F_{NH_4} = \frac{f_{nit}}{f_{nit} + f_{vol}} * N_{nitvol} \quad (\text{Eq. S45})$$

Where  $f_{nit}$  and  $f_{vol}$  are the fractions of N lost to nitrification and volatilization.  $N_{nitvol}$  ( $\text{g N ha}^{-1} \text{ d}^{-1}$ ) is the amount of ammonium converted via nitrification and volatilization.

The effect of soil moisture ( $F_{\theta}$ ) on nitrification:

$$F_{\theta} = \frac{SW_{ly} - WP_{ly}}{0.25 * (FC_{ly} - WP_{ly})} \quad \text{if } SW_{ly} < 0.25 * FC_{ly} - 0.75 * WP_{ly} \quad (\text{Eq. S46})$$

$$F_{\theta} = 1.0 \quad \text{if } SW_{ly} \geq 0.25 * FC_{ly} - 0.75 * WP_{ly} \quad (\text{Eq. S47})$$

Where  $SW_{ly}$  is soil water content (mm),  $WP_{ly}$  is the amount of water held in the soil at the wilting point water content (mm), and  $FC_{ly}$  is amount of water held in the soil layer at field capacity water content (mm).

The effect of soil temperature ( $F_{T_{mp}}$ ) on nitrification is provided by the following factor:

$$F_{T_{mp}} = 0.41 * \frac{SoilTem - 5}{10} \quad \text{if } SoilTem > 5 \quad (\text{Eq. S48})$$

The effect of soil pH ( $F_{pH}$ ) on nitrification is provided by the following factor:

$$F_{pH} = 0.56 + \frac{\arctan(\pi * 0.45 * (-5 + soilpH))}{\pi} \quad (\text{Eq. S49})$$

#### Denitrification process

The SWAT model determines the amount of nitrate lost to denitrification with the equation (Eq. S50 and Eq. S51) [33]:

$$D_t = NO3_{ly} * (1 - \exp(-\beta_{denit} * \gamma_{tmp,ly} * orgC_{ly})) \quad \text{if } \gamma_{sw,ly} \geq \gamma_{sw,thr} \quad (\text{Eq. S50})$$

$$N_{denit,ly} = 0.0 \quad \text{if } \gamma_{sw,ly} < \gamma_{sw,thr} \quad (\text{Eq. S51})$$

where  $D_t$  is the amount of nitrogen lost to denitrification ( $\text{kg N/ha}$ ).  $NO3_{ly}$  is the amount of nitrate in layer ly ( $\text{kg N/ha}$ ).  $\beta_{denit}$  is the rate coefficient for denitrification.  $\gamma_{tmp,ly}$  is the nutrient cycling temperature factor for layer ly.  $\gamma_{sw,ly}$  is the nutrient cycling water factor for layer ly.  $orgC_{ly}$  is the amount of organic carbon in the layer (%), and  $\gamma_{sw,thr}$  is the threshold value of nutrient cycling water factor for denitrification to occur.

The effect of nutrient cycling temperature factor on denitrification:

$$\gamma_{tmp,ly} = \text{Max} \left[ \left( 0.9 * \frac{SoilTemp}{SoilTemp + e^{(9.93 - 0.312 * SoilTemp)}} + 0.1 \right), 0.1 \right] \quad (\text{Eq. S52})$$

The effect of nutrient cycling water factor on denitrification:

$$\gamma_{sw,ly} = \frac{SW_{ly}}{FC_{ly}} \quad (\text{Eq. S53})$$

Where  $SW_{ly}$  is soil water content (mm) and  $FC_{ly}$  is amount of water held in the soil layer at field capacity water content (mm).

Wagena et al. [35] developed equations for the impact of soil pH on denitrification:

$$Fd(pH) = \begin{cases} 0.001 & \text{for } pH \leq 3.5 \\ \frac{pH-3.5}{3} & \text{for } 3.5 < pH < 6.5 \\ 1 & \text{for } pH \geq 6.5 \end{cases} \quad (\text{Eq. S54})$$

### Partitioning N<sub>2</sub>O from N<sub>2</sub>

For partitioning N<sub>2</sub>O from gases of denitrification, Wagena et al. [35] used the same equations as Parton et al. [29] developed for the DAYCENT model (Eq.S12), and further included the effect of soil pH ( $Fr(pH)$ ) for the ratio N<sub>2</sub>O/N<sub>2</sub>:

$$Fr(pH) = \frac{1}{1470 * e^{-1.1 * pH}} \quad (\text{Eq. S55})$$

R codes used to plot and visualize the differences of the representation of each environmental factors on N<sub>2</sub>O can be found in the following link: <https://github.com/snailslowrun/N2O/blob/main/comparison.R>

### References

1. Abdalla, M., Smith, P., & Williams, M. Emissions of nitrous oxide from agriculture: Responses to management and climate change. In Understanding Greenhouse Gas Emissions from Agricultural Management (pp. 343-370). American Chemical Society 2011. <https://doi.org/10.1021/bk-2011-1072.ch018>
2. Aguilera, E., Lassaletta, L., Sanz-Cobena, A., Garnier, J., & Vallejo, A. The potential of organic fertilizers and water management to reduce N<sub>2</sub>O emissions in Mediterranean climate cropping systems. A review. *Agriculture, ecosystems & environment* **2013**, 164, 32-52. <https://doi.org/10.1016/j.agee.2012.09.006>
3. Beauchamp, E. G. Nitrous oxide emission from agricultural soils. *Canadian Journal of Soil Science* **1997**, 77, 113-123. <https://doi.org/10.4141/S96-101>
4. Bremner, J. M. Sources of nitrous oxide in soils. *Nutrient cycling in Agroecosystems* **1997**, 49, 7-16. <https://doi.org/10.1023/A:1009798022569>
5. Bouwman, A. F., Boumans, L. J. M., & Batjes, N. H. Modeling global annual N<sub>2</sub>O and NO emissions from fertilized fields. *Global Biogeochemical Cycles* **2002**, 16, 28-1. <https://doi.org/10.1029/2001GB001812>
6. Butterbach-Bahl, K., & Dannenmann, M. Denitrification and associated soil N<sub>2</sub>O emissions due to agricultural activities in a changing climate. *Current Opinion in Environmental Sustainability* **2011**, 3, 389-395. <https://doi.org/10.1016/j.cosust.2011.08.004>
7. Cameron, K. C., Di, H. J., & Moir, J. L. Nitrogen losses from the soil/plant system: a review. *Annals of Applied Biology* **2013**, 162, 145-173. <https://doi.org/10.1111/aab.12014>
8. Charles, A., Rochette, P., Whalen, J. K., Angers, D. A., Chantigny, M. H., & Bertrand, N. Global nitrous oxide emission factors from agricultural soils after addition of organic amendments: A meta-analysis. *Agriculture, ecosystems & environment* **2017**, 236, 88-98. <https://doi.org/10.1016/j.agee.2016.11.021>
9. Dalal, R. C., Wang, W., Robertson, G. P., & Parton, W. J. Nitrous oxide emission from Australian agricultural lands and mitigation options: a review. *Soil Research* **2003**, 41, 165-195. <https://doi.org/10.1071/SR02064>
10. De Klein, C. A., Sherlock, R. R., Cameron, K. C., & van der Weerden, T. J. Nitrous oxide emissions from agricultural soils in New Zealand—a review of current knowledge and directions for future research. *Journal of the Royal Society of New Zealand* **2001**, 31, 543-574. <https://doi.org/10.1080/03014223.2001.9517667>
11. Eichner, M. J. Nitrous oxide emissions from fertilized soils: summary of available data. *Journal of environmental quality* **1990**, 19, 272-280. <https://doi.org/10.2134/jeq1990.00472425001900020013x>
12. Groffman, P. M., Altabet, M. A., Böhlke, J. K., Butterbach-Bahl, K., David, M. B., Firestone, M. K., ... & Voytek, M. A. Methods for measuring denitrification: diverse approaches to a difficult problem. *Ecological Applications* **2006**, 16, 2091-2122. [https://doi.org/10.1890/1051-0761\(2006\)016\[2091:MFMDDA\]2.0.CO;2](https://doi.org/10.1890/1051-0761(2006)016[2091:MFMDDA]2.0.CO;2)



13. Lesschen, J. P., Velthof, G. L., de Vries, W., & Kros, J. Differentiation of nitrous oxide emission factors for agricultural soils. *Environmental pollution* **2011**, 159, 3215-3222. <https://doi.org/10.1016/j.envpol.2011.04.001>
14. Meurer, K. H., Franko, U., Stange, C. F., Dalla Rosa, J., Madari, B. E., & Jungkunst, H. F. Direct nitrous oxide (N<sub>2</sub>O) fluxes from soils under different land use in Brazil—a critical review. *Environmental Research Letters* **2016**, 11, 023001. <https://doi.org/10.1088/1748-9326/11/2/023001>
15. Mosier, A. R. Nitrous oxide emissions from agricultural soils. *Fertilizer Research* **1994**, 37, 191-200. <https://doi.org/10.1007/BF00748937>
16. Oertel, C., Matschullat, J., Zurba, K., Zimmermann, F., & Erasmí, S. Greenhouse gas emissions from soils—A review. *Geochemistry* **2016**, 76, 327-352. <https://doi.org/10.1016/j.chemer.2016.04.002>
17. Saggar, S., Jha, N., Deslippe, J., Bolan, N. S., Luo, J., Giltrap, D. L., ... & Tillman, R. W. Denitrification and N<sub>2</sub>O: N<sub>2</sub> production in temperate grasslands: Processes, measurements, modelling and mitigating negative impacts. *Science of the Total Environment* **2013**, 465, 173-195. <https://doi.org/10.1016/j.scitotenv.2012.11.050>
18. Sanz-Cobena, A., Lassaletta, L., Aguilera, E., Del Prado, A., Garnier, J., Billen, G., ... & Plaza-Bonilla, D. Strategies for greenhouse gas emissions mitigation in Mediterranean agriculture: A review. *Agriculture, ecosystems & environment* **2017**, 238, 5-24. <https://doi.org/10.1016/j.agee.2016.09.038>
19. Signor, D., & Cerri, C. E. P. Nitrous oxide emissions in agricultural soils: a review. *Pesquisa Agropecuária Tropical* **2013**, 43, 322-338. <https://doi.org/10.1590/S1983-40632013000300014>
20. Smith, K. A., McTaggart, I. P., & Tsuruta, H. Emissions of N<sub>2</sub>O and NO associated with nitrogen fertilization in intensive agriculture, and the potential for mitigation. *Soil use and management* **1997**, 13, 296-304. <https://doi.org/10.1111/j.1475-2743.1997.tb00601.x>
21. Smith, K. A. Changing views of nitrous oxide emissions from agricultural soil: key controlling processes and assessment at different spatial scales. *European Journal of Soil Science* **2017**, 68, 137-155. <https://doi.org/10.1111/ejss.12409>
22. Snyder, C. S., Bruulsema, T. W., Jensen, T. L., & Fixen, P. E. Review of greenhouse gas emissions from crop production systems and fertilizer management effects. *Agriculture, Ecosystems & Environment* **2009**, 133, 247-266. <https://doi.org/10.1016/j.agee.2009.04.021>
23. Stehfest, E., & Bouwman, L. N<sub>2</sub>O and NO emission from agricultural fields and soils under natural vegetation: summarizing available measurement data and modeling of global annual emissions. *Nutrient Cycling in Agroecosystems* **2006**, 74, 207-228. <https://doi.org/10.1007/s10705-006-9000-7>
24. Stein, L. Y., & Yung, Y. L. Production, isotopic composition, and atmospheric fate of biologically produced nitrous oxide. *Annual Review of Earth and Planetary Sciences* **2003**, 31, 329-356. <https://doi.org/10.1146/annurev.earth.31.110502.080901>
25. Trost, B., Prochnow, A., Drastig, K., Meyer-Aurich, A., Ellmer, F., & Baumecker, M. Irrigation, soil organic carbon and N<sub>2</sub>O emissions. A review. *Agronomy for sustainable development* **2013**, 33, 733-749. <https://doi.org/10.1007/s13593-013-0134-0>
26. Uchida, Y., & Akiyama, H. Mitigation of postharvest nitrous oxide emissions from soybean ecosystems: a review. 2013. <https://doi.org/10.1080/00380768.2013.805433>
27. Wang, J., Chadwick, D. R., Cheng, Y., & Yan, X. Global analysis of agricultural soil denitrification in response to fertilizer nitrogen. *Science of the Total Environment* **2018**, 616, 908-917. <https://doi.org/10.1016/j.scitotenv.2017.10.229>
28. Xu, Y., Xu, Z., Cai, Z., & Reverchon, F. Review of denitrification in tropical and subtropical soils of terrestrial ecosystems. *Journal of Soils and Sediments* **2013**, 13, 699-710. <https://doi.org/10.1007/s11368-013-0650-1>
29. Parton, W. J., Mosier, A. R., Ojima, D. S., Valentine, D. W., Schimel, D. S., Weier, K., & Kulmala, A. E. Generalized model for N<sub>2</sub> and N<sub>2</sub>O production from nitrification and denitrification. *Global biogeochemical cycles* **1996**, 10, 401-412. <https://doi.org/10.1029/96GB01455>
30. Weier, K. L., Doran, J. W., Power, J. F., & Walters, D. T. Denitrification and the dinitrogen/nitrous oxide ratio as affected by soil water, available carbon, and nitrate. *Soil Science Society of America Journal* **1993**, 57, 66-72. <https://doi.org/10.2136/sssaj1993.03615995005700010013x>
31. Parton, W. J., Holland, E. A., Del Grosso, S. J., Hartman, M. D., Martin, R. E., Mosier, A. R., ... & Schimel, D. S. Generalized model for NO<sub>x</sub> and N<sub>2</sub>O emissions from soils. *Journal of Geophysical Research: Atmospheres* **2001**, 106, 17403-17419. <https://doi.org/10.1029/2001JD900101>
32. Li, C. User's Guide for the DNDC Model (version 9.5). 201. University of New Hampshire. <http://www.dnnc.sr.unh.edu/model/GuideDNDC95.pdf>
33. Neitsch, S. L., Arnold, J. G., Kiniry, J. R., & Williams, J. R. Soil and water assessment tool theoretical documentation version 2009. Texas Water Resources Institute. <https://swat.tamu.edu/media/99192/swat2009-theory.pdf>
34. Shrestha, N. K., Thomas, B. W., Du, X., Hao, X., & Wang, J. Modeling nitrous oxide emissions from rough fescue grassland soils subjected to long-term grazing of different intensities using the Soil and Water Assessment Tool (SWAT). *Environmental Science and Pollution Research* **2018**, 25, 27362-27377. <https://doi.org/10.1007/s11356-018-2719-2>
35. Wagena, M. B., Bock, E. M., Sommerlot, A. R., Fuka, D. R., & Easton, Z. M. Development of a nitrous oxide

routine for the SWAT model to assess greenhouse gas emissions from agroecosystems. *Environmental modelling & software* **2017**, 89, 131-143. <https://doi.org/10.1016/j.envsoft.2016.11.013>
